# Supplementary material
Source: HighWire-hosted journal article supplement (http://www.cmaj.ca/highwire/filestream/58064/field_highwire_adjunct_files/0/flu-falagas-online_appendix_1.pdf)
Supplement: flu-falagas-online_appendix_1.pdf [file flu-falagas-online_appendix_1.pdf]

**Appendix 1: Main characteristics of randomized controlled trials included in the meta-analysis of studies comparing fluoroquinolones and  $\beta$ -lactam antibiotics for the treatment of acute bacterial sinusitis (part 1 of 3)**

| Study                                              | Design                                                                   | Study population                                                               | Inclusion criteria                                                                                                                                                                                                                                                                                       | Mean age, yr              | No. of patients        |                        |                        | Antibiotic regimen (duration of treatment)                                                        |                                                                     |
|----------------------------------------------------|--------------------------------------------------------------------------|--------------------------------------------------------------------------------|----------------------------------------------------------------------------------------------------------------------------------------------------------------------------------------------------------------------------------------------------------------------------------------------------------|---------------------------|------------------------|------------------------|------------------------|---------------------------------------------------------------------------------------------------|---------------------------------------------------------------------|
|                                                    |                                                                          |                                                                                |                                                                                                                                                                                                                                                                                                          |                           | Enrolled (% women)     | Intention-to-treat     | Clinically evaluable   | Fluoroquinolone                                                                                   | $\beta$ -Lactam                                                     |
| Arrieta et al <sup>21</sup> (2007, Mexico)         | Open-label, multicentre prospective randomized phase IIIb clinical trial | Adult outpatients with acute bacterial sinusitis                               | Clinical: 7-28 d duration; at least one of facial pain or tightness spontaneously or after pressure in any sinus site, anterior or posterior nasal discharge, or cough and 2 or more within 2 d before enrolment of fever, headache, nasal congestion, lacrimation<br>Computed tomography or radiography | 37 v. 38                  | 576 (63 v. 62)         | 289 v. 286             | 226 v. 233             | Moxifloxacin 400 mg by mouth once daily (7 d)                                                     | Amoxicillin-clavulanate 500/125 mg by mouth three times daily (7 d) |
| Henry et al <sup>22</sup> (2004, United States)    | Multicentre randomized double-blind clinical trial                       | Adult outpatients with acute uncomplicated maxillary rhinosinusitis            | Clinical: 7-21 d duration; facial pain or pressure in one or both maxillary sinuses, facial swelling or toothache, purulent nasal discharge<br>Computed tomography or radiography: air-fluid level or opacity in one or both maxillary sinuses                                                           | 40.4 v. 42.5              | 271 (60 v. 61)         | 133 v. 138             | 118 v. 123             | Levofloxacin 500 mg by mouth once daily (10 d)                                                    | Cefdinir 600 mg by mouth once daily (10 d)                          |
| Jareoncharsri et al <sup>23</sup> (2004, Thailand) | Open-label randomized comparative clinical trial                         | Outpatients • 16 yrs old with acute or acute exacerbation of chronic sinusitis | Clinical: < 28 d duration; nasal obstruction, purulent nasal discharge or postnasal drip, impairment of sense of smell, foul smell, headache<br>Radiography: air-fluid level, opacity, mucosal thickening                                                                                                | 35.5                      | 60 (62)                | 34 v. 26               | 34 v. 26               | Levofloxacin 300 mg by mouth once daily (14 d)                                                    | Amoxicillin-clavulanate 625 mg by mouth three times daily (14 d)    |
| Sher et al <sup>24</sup> (2002, United States)†    | Multicentre randomized investigator-blinded clinical trial               | Adult patients with acute uncomplicated maxillary sinusitis                    | Clinical: 7-28 d duration; facial pain or tenderness in one or both maxillary sinuses, purulent nasal or postnasal discharge<br>Radiography: air-fluid level, opacity, mucosal thickening $\geq$ 5 mm in one or both maxillary sinuses                                                                   | [41.1 v.]<br>42.4 v. 41.9 | 445 ([64 v.] 65 v. 64) | [149 v.]<br>141 v. 155 | [137 v.]<br>127 v. 141 | [Gatifloxacin 400 mg by mouth once daily (5 d) v.] gatifloxacin 400 mg by mouth once daily (10 d) | Amoxicillin-clavulanate 875 mg by mouth twice daily (10 d)          |

**Appendix 1: Main characteristics of randomized controlled trials included in the meta-analysis of studies comparing fluoroquinolones and  $\beta$ -lactam antibiotics for the treatment of acute bacterial sinusitis (part 2 of 3)**

| Study                                               | Design                                                                  | Study population                                                                                      | Inclusion criteria                                                                                                                                                                                                                                                                  | Mean age, yr | No. of patients    |                    |                      | Antibiotic regimen (duration of treatment)         |                                                                          |
|-----------------------------------------------------|-------------------------------------------------------------------------|-------------------------------------------------------------------------------------------------------|-------------------------------------------------------------------------------------------------------------------------------------------------------------------------------------------------------------------------------------------------------------------------------------|--------------|--------------------|--------------------|----------------------|----------------------------------------------------|--------------------------------------------------------------------------|
|                                                     |                                                                         |                                                                                                       |                                                                                                                                                                                                                                                                                     |              | Enrolled (% women) | Intention-to-treat | Clinically evaluable | Fluoroquinolone                                    | $\beta$ -Lactam                                                          |
| Rakkar et al <sup>25</sup> (2001, United States)    | Open-label multicentre prospective randomized phase IIIb clinical trial | Adult outpatients with acute bacterial maxillary sinusitis                                            | Clinical: 7-30 d duration; nasal congestion and purulent discharge, coughing, frontal headache, malar pain                                                                                                                                                                          | 43 v. 42     | 475 (69 v. 65)     | 238 v. 237         | 170 v. 171           | Moxifloxacin 400 mg by mouth twice daily (10 d)    | Amoxicillin/clavulanate 875 mg by mouth twice daily (10 d)               |
| Siegert et al <sup>26</sup> (2000, Germany)         | Multicentre randomized double-blind phase III clinical trial            | Adult outpatients with acute bacterial sinusitis                                                      | Clinical: > 7 d duration; 2 or more of nasal congestion and purulent discharge, coughing, frontal headache and malar pain<br>Radiography: air-fluid level, opacity, mucoperiosteal thickening                                                                                       | 40.4 v. 40.3 | 498 (55 v. 56)     | 242 v. 251         | 211 v. 225           | Moxifloxacin 400 mg by mouth once daily (7 d)      | Cefuroxime axetil 250 mg by mouth twice daily (10 d)                     |
| Adelglass et al <sup>27</sup> (1999, United States) | Open-label, multicentre randomized comparative clinical trial           | Adult outpatients with acute sinusitis                                                                | Clinical: < 4 wk duration; 2 or more of fever, headache, purulent nasal discharge, facial pain, malar tenderness<br>Computed tomography or radiography: air-fluid level, opacity, mucosal thickening $\geq$ 4 mm in at least one sinus                                              | 39.2 v. 38.6 | 615 (62 v. 64)     | 306 v. 309*        | 267 v. 268           | Levofloxacin 500 mg by mouth once daily (10-14 d)‡ | Amoxicillin-clavulanate 500/125 mg by mouth three times daily (10-14 d)‡ |
| Burke et al <sup>28</sup> (1999, United States)     | Multicentre randomized double-blind clinical trial                      | Adult outpatients with acute maxillary sinusitis                                                      | Clinical: 7-28 d duration; 2 or more of nasal congestion, postnasal drainage, purulent nasal discharge, coughing, malar tenderness, frontal headache<br>Radiography: air-fluid level, opacity, mucosal thickening $\geq$ 6 mm                                                       | 40 v. 39     | 542 (62 v. 60)     | 267 v. 275         | 223 v. 234           | Moxifloxacin 400 mg by mouth once daily (10 d)     | Cefuroxime axetil 250 mg by mouth twice daily (10 d)                     |
| Johnson et al <sup>29</sup> (1999, United States)   | Prospective multicentre randomized double-blind clinical trial          | Adult outpatients with acute bacterial maxillary sinusitis or acute exacerbation of chronic sinusitis | Clinical: $\leq$ 28 d duration; 2 or more of fever > 38°C, leukocytes > $10 \times 10^9/L$ , chills, malaise, toothache, headache, nasal congestion, postnasal drainage, coughing, malar tenderness, edema<br>Radiography: air-fluid level, opacity, mucosal thickening $\geq$ 6 mm | 40 v. 43     | 501 (60 v. 57)     | 250 v. 251         | 228 v. 225           | Ciprofloxacin 500 mg by mouth twice daily (10 d)   | Cefuroxime axetil 250 mg by mouth twice daily (10 d)                     |

**Appendix 1:** Main characteristics of randomized controlled trials included in the meta-analysis of studies comparing fluoroquinolones and  $\beta$ -lactam antibiotics for the treatment of acute bacterial sinusitis (part 3 of 3)

| Study                                          | Design                                                        | Study population                                    | Inclusion criteria                                                                                                                                                                                                                                                                                    | Mean age, yr | No. of patients    |                    |                      | Antibiotic regimen (duration of treatment)                                                        |                                                      |
|------------------------------------------------|---------------------------------------------------------------|-----------------------------------------------------|-------------------------------------------------------------------------------------------------------------------------------------------------------------------------------------------------------------------------------------------------------------------------------------------------------|--------------|--------------------|--------------------|----------------------|---------------------------------------------------------------------------------------------------|------------------------------------------------------|
|                                                |                                                               |                                                     |                                                                                                                                                                                                                                                                                                       |              | Enrolled (% women) | Intention-to-treat | Clinically evaluable | Fluoroquinolone                                                                                   | $\beta$ -Lactam                                      |
| Weis et al <sup>30</sup> (1998, United States) | Open-label multicentre randomized double-blind clinical trial | Adult outpatients with acute bacterial sinusitis    | Clinical: < 28 d duration; at least 2 major symptoms or 1 major and 2 minor symptoms, where major symptoms are fever, facial congestion, nasal obstruction, purulent nasal drainage, facial pain, and hyposmia, and minor symptoms are headache, ear pain, dental pain, fatigue, halitosis, and cough | 43.5 v. 43.5 | 1414 (68 v. 66)    | 711 v. 700         | 613 v. 606           | Ciprofloxacin 500 mg by mouth twice daily (10 d)                                                  | Cefuroxime axetil 250 mg by mouth twice daily (10 d) |
| Gehanno et al <sup>31</sup> (1996, France)     | Multicentre randomized double-blind clinical trial            | Adult outpatients with purulent maxillary sinusitis | Clinical: < 21 d duration; pus on middle meatus, purulent rhinorrhea, pain or tenderness over the affected sinuses                                                                                                                                                                                    | 41 v. 42     | 382 (61 v. 54)     | 190 v. 184*        | 155 v. 149           | Sparfloxacin loading dose 400 mg (1 d), then 200 mg by mouth once daily (4 d), then placebo (3 d) | Cefuroxime axetil 250 mg by mouth twice daily (8 d)  |

\*Modified intention-to-treat population.

†Data in square brackets refer to gatifloxacin regimen (5-day duration), which were not taken into account in the meta-analysis.

‡Duration of treatment varied according to clinical indications. Mean duration of treatment was 13 days for levofloxacin and 12 days for amoxicillin-clavulanate.
